# Supplementary material for: ニュー・パブリック・マネジメント : コスモポリタンな対話への招待 (特集 スマート・プラクティス政府 : 行政の経営改革)
Source: publisher site journal article supplement (doi:10.18632/aging.102054), 2002-01-01
Supplement: Supplementary file [file aging-v11i14-102054-supplementary-material-SD1.pdf]

## SUPPLEMENTARY MATERIAL

### Supplementary Tables

**Supplementary Table 1. Proteomics Analysis: Mitochondrial-Related Proteins Up-regulated in MCF7-Fibroblast Co-Cultures.**

| Gene Symbol | Description                                                                                      | Fold-Increase | Mito-Complex | MRP/Chaperone |
|-------------|--------------------------------------------------------------------------------------------------|---------------|--------------|---------------|
| NDUFAF2     | Mimitin, c-Myc-induced mitochondrial protein; B17.2L (related to NDUFAF4/HRPAP20)                | Infinity      | I            | Chaperone     |
| GPD2        | Glycerol-3-phosphate dehydrogenase, mitochondrial (ROS/H <sub>2</sub> O <sub>2</sub> Production) | 238.91        |              |               |
| AIFM1       | Apoptosis-inducing factor 1, mitochondrial (NADH oxidase activity)                               | 237.74        | I, III, IV   | Chaperone     |
| PRKDC       | DNA-dependent protein kinase catalytic subunit (mitochondrial genome maintenance)                | 102.78        |              |               |
| DNAJA3      | HSP40, DnaJ homolog, subfamily A, member 3, mitochondrial                                        | 76.43         |              | Chaperone     |
| MRPL43      | Mitochondrial ribosomal protein L43                                                              | 66.38         |              | MRP           |
| COX411      | Cytochrome c oxidase subunit 4 isoform 1                                                         | 56.68         | IV           |               |
| HSPD1       | HSP60, 60 kDa heat shock protein, mitochondrial                                                  | 29.29         |              | Chaperone     |
| MRRF        | Ribosome-recycling factor, mitochondrial                                                         | 23.53         |              | MRP           |
| SLC25A5     | Solute Carrier Family 25 (Mitochondrial Carrier; ADP/ATP Translocator), Member 5                 | 14.49         |              |               |
| VDAC2       | Voltage-dependent anion-selective channel protein 2                                              | 13.60         |              |               |
| UQCRC1      | RISP, Ubiquinol-cytochrome C reductase iron-sulfur subunit, (Rieske iron-sulfur protein)         | 13.07         | III          |               |
| VDAC1       | Voltage-dependent anion-selective channel protein 1                                              | 10.05         |              |               |
| ECH1        | Delta(3,5)-Delta(2,4)-dienoyl-CoA isomerase, mitochondrial                                       | 8.51          |              |               |
| MCCC2       | Methylcrotonoyl-CoA carboxylase beta chain, mitochondrial                                        | 4.52          |              |               |
| MRPS28      | MRPS28 protein                                                                                   | 3.86          |              | MRP           |
| ATP5A1      | ATP synthase subunit alpha, mitochondrial (EC 3.6.3.14)                                          | 3.83          | V            |               |
| SUCLG2      | Succinyl-CoA ligase [GDP-forming] subunit beta, mitochondrial                                    | 3.58          |              |               |
| ABAT        | 4-aminobutyrate aminotransferase, mitochondrial                                                  | 3.44          |              |               |
| IMMT        | Mitochondrial inner membrane protein                                                             | 3.27          |              |               |
| AK4         | Adenylate kinase isoenzyme 4, mitochondrial                                                      | 3.02          |              |               |
| GOT2        | Aspartate aminotransferase, mitochondrial                                                        | 2.87          |              |               |
| HSPA9       | heat shock 70kDa protein 9 (mortalin), mitochondrial                                             | 2.47          |              | Chaperone     |
| TUFM        | Elongation factor Tu, mitochondrial                                                              | 2.37          |              |               |
| CLUH        | Clustered mitochondria protein homolog                                                           | 2.15          |              |               |
| OAT         | Ornithine aminotransferase, mitochondrial                                                        | 2.14          |              |               |
| IDH1        | Isocitrate dehydrogenase [NADP], cytoplasmic                                                     | 2.10          |              |               |
| SLC25A3     | Solute carrier family 25 (mitochondrial carrier; phosphate carrier), member 3                    | 2.09          |              |               |
| NDUFA5      | NADH dehydrogenase [ubiquinone] 1 alpha subcomplex subunit 5                                     | 2.08          | I            |               |
| UQCRC2      | Cytochrome b-c1 complex subunit 2, mitochondrial                                                 | 2.07          | III          |               |
| ETFA        | Electron transfer flavoprotein subunit alpha, mitochondrial                                      | 2.05          |              |               |
| PPA2        | Inorganic pyrophosphatase 2, mitochondrial                                                       | 2.03          |              |               |
| ECHS1       | Enoyl-CoA hydratase, mitochondrial                                                               | 2.02          |              |               |
| PPT1        | Palmitoyl-protein thioesterase 1                                                                 | 1.91          |              |               |

|          |                                                                                |      |           |
|----------|--------------------------------------------------------------------------------|------|-----------|
| DLD      | Dihydrolipoyl dehydrogenase, mitochondrial                                     | 1.89 |           |
| CHCHD3   | Coiled-coil-helix-coiled-coil-helix domain-containing protein 3, mitochondrial | 1.89 |           |
| ATP5H    | ATP synthase subunit d, mitochondrial                                          | 1.88 | V         |
| IARS2    | Isoleucine--tRNA ligase, mitochondrial                                         | 1.86 |           |
| LRPPRC   | Leucine-rich PPR-motif containing, mitochondrial                               | 1.85 |           |
| PC       | Pyruvate carboxylase, mitochondrial                                            | 1.79 |           |
| HADHA    | Trifunctional enzyme subunit alpha, mitochondrial                              | 1.74 |           |
| SLC25A13 | Calcium-binding mitochondrial carrier protein Aralar2                          | 1.74 |           |
| TRAP1    | Heat shock protein 75 kDa, mitochondrial                                       | 1.72 | Chaperone |
| ACADSB   | Short/branched chain specific acyl-CoA dehydrogenase, mitochondrial            | 1.72 |           |
| CPT1A    | Carnitine palmitoyltransferase 1A, mitochondrial                               | 1.65 |           |

---

-Proteins listed above (45 in total) were all upregulated in MCF7-Fibroblast Co-cultures (p <0.05). **MRP**, mitochondrial ribosomal proteins

**Supplementary Table 2. Proteomics Analysis: Ribosomal Proteins Up-regulated in MCF7-Fibroblast Co-Cultures.**

| <b>Gene Symbol</b> | <b>Description</b>              | <b>Fold-Increase</b> |
|--------------------|---------------------------------|----------------------|
| RPL4               | 60S ribosomal protein L4        | Infinity             |
| RPL15              | 60S ribosomal protein L15       | 2,238.12             |
| RPL19              | 60S ribosomal protein L19       | 168.84               |
| RPL36AL            | 60S ribosomal protein L36a-like | 54.47                |
| RPL24              | 60S ribosomal protein L24       | 43.56                |
| RPL10              | 60S ribosomal protein L10       | 42.78                |
| RPL29              | 60S ribosomal protein L29       | 20.53                |
| RPL18A             | 60S ribosomal protein L18a      | 17.08                |
| RPL8               | 60S ribosomal protein L8        | 5.74                 |
| RPL34              | 60S ribosomal protein L34       | 5.36                 |
| RPL13              | 60S ribosomal protein L13       | 5.31                 |
| RPL14              | 60S ribosomal protein L14       | 3.09                 |
| RPL3               | 60S ribosomal protein L3        | 3.04                 |
| RPL27a             | 60S ribosomal protein L27a      | 2.99                 |
| RPLP2              | 60S acidic ribosomal protein P2 | 2.90                 |
| RPL6               | 60S ribosomal protein L6        | 2.05                 |
| RPL5               | 60S ribosomal protein L5        | 2.04                 |
| RPL28              | 60S ribosomal protein L28       | 2.00                 |
| RPS29              | 40S ribosomal protein S29       | Infinity             |
| RPS10              | 40S ribosomal protein S10       | 74.47                |
| RPS6               | 40S ribosomal protein S6        | 23.37                |
| RPS18              | 40S ribosomal protein S18       | 9.20                 |
| RPS27A             | 40S ribosomal protein S27a      | 5.19                 |
| RPS2               | 40S ribosomal protein S2        | 2.98                 |
| RPS27A             | 40S ribosomal protein S27a      | 2.96                 |
| RPS3A              | 40S ribosomal protein S3A       | 2.39                 |
| RPS19              | 40S ribosomal protein S19       | 2.05                 |
| RPS11              | 40S ribosomal protein S11       | 2.00                 |

---

-Proteins listed above (28 in total) were all upregulated in MCF7-Fibroblast Co-cultures (p <0.05).

**Supplementary Table 3. Proteomics Analysis: Other Chaperones Up-regulated in MCF7-Fibroblast Co-Cultures.**

| <b>Gene Symbol</b> | <b>Description</b>                                               | <b>Fold-Increase</b> |
|--------------------|------------------------------------------------------------------|----------------------|
| HSP90AB1           | Heat Shock Protein 90kDa Alpha (Cytosolic), Class B Member 1     | Infinity             |
| HSPA5              | 78 kDa glucose-regulated protein                                 | 82.18                |
| HSP90AA1           | Heat Shock Protein 90kDa Alpha (Cytosolic), Class A Member 1     | 79.52                |
| HSPB1              | Heat Shock 27kDa Protein 1                                       | 35.73                |
| HSPA8              | Heat shock cognate 71 kDa protein                                | 8.42                 |
| HSPA4              | Heat shock 70 kDa protein                                        | 5.38                 |
| STIP1              | Stress-induced-phosphoprotein 1 (HSP70/HSP90-organizing protein) | 2.99                 |
| CDC37              | HSP90 co-chaperone Cdc37                                         | 2.83                 |
| HSPA2              | Heat shock-related 70 kDa protein 2                              | 2.59                 |
| HSPH1              | Heat shock protein 105 kDa                                       | 2.53                 |

---

-Proteins listed above (10 in total) were all upregulated in MCF7-Fibroblast Co-cultures (p <0.05).

**Supplementary Table 4. Proteomics Analysis: Proteins Involved in mRNA Translation Initiation, Polypeptide Elongation, tRNA Synthesis and Amino Acid Uptake are All Up-regulated in MCF7-Fibroblast Co-Cultures.**

| Gene Symbol                                                                     | Description                                                                | Fold-Increase |
|---------------------------------------------------------------------------------|----------------------------------------------------------------------------|---------------|
| <b>Translation initiation factors (required for mRNA binding to ribosomes)</b>  |                                                                            |               |
| EIF2S1                                                                          | Eukaryotic translation initiation factor 2 subunit 1                       | 291.47        |
| EIF3H                                                                           | Eukaryotic translation initiation factor 3 subunit H                       | 81.05         |
| EIF4H                                                                           | Eukaryotic translation initiation factor 4H                                | 31.21         |
| EIF4A1                                                                          | Eukaryotic translation initiation factor 4A-I                              | 18.85         |
| EIF5                                                                            | Eukaryotic translation initiation factor 5                                 | 8.72          |
| EIF3A                                                                           | Eukaryotic translation initiation factor 3 subunit A                       | 2.94          |
| EIF2S3L                                                                         | Putative eukaryotic translation initiation factor 2 subunit 3-like protein | 2.86          |
| EIF3E                                                                           | Eukaryotic translation initiation factor 3 subunit E                       | 2.30          |
| EIF3B                                                                           | Eukaryotic translation initiation factor 3 subunit B                       | 1.85          |
| <b>Elongation factors (promote delivery of aminoacyl tRNAs to the ribosome)</b> |                                                                            |               |
| EEF2                                                                            | Elongation factor 2                                                        | 18.96         |
| EEF1G                                                                           | Elongation factor 1-gamma                                                  | 2.45          |
| TUFM                                                                            | Elongation factor Tu, mitochondrial                                        | 2.37          |
| EEF1A2                                                                          | Elongation factor 1-alpha 2                                                | 2.36          |
| EEF1A1                                                                          | Elongation factor 1-alpha                                                  | 2.03          |
| EEF1D                                                                           | Elongation factor 1-delta                                                  | 1.86          |
| <b>Enzymes for tRNA Synthesis</b>                                               |                                                                            |               |
| QARS                                                                            | Glutamine--tRNA ligase, cytoplasmic                                        | 31.90         |
| DARS                                                                            | Aspartate--tRNA ligase, cytoplasmic                                        | 9.69          |
| MARS                                                                            | Methionine-tRNA synthetase, cytoplasmic                                    | 3.44          |
| RTCB                                                                            | tRNA-splicing ligase RtcB homolog (C22orf28)                               | 3.25          |
| DTD1                                                                            | D-tyrosyl-tRNA(Tyr) deacylase 1                                            | 3.10          |
| YARS                                                                            | Tyrosine--tRNA ligase, cytoplasmic                                         | 2.38          |
| RARS                                                                            | Arginine--tRNA ligase, cytoplasmic                                         | 2.23          |
| AARS                                                                            | Alanyl-tRNA synthetase, cytoplasmic                                        | 2.23          |
| IARS2                                                                           | Isoleucine--tRNA ligase, mitochondrial                                     | 1.86          |
| AIMP2                                                                           | Aminoacyl tRNA synthase complex-interacting multifunctional protein 2      | 1.70          |
| GARS                                                                            | Glycine--tRNA ligase, cytoplasmic                                          | 1.70          |
| EPRS                                                                            | Bifunctional glutamate/proline--tRNA ligase                                | 1.67          |
| TRMT112                                                                         | tRNA methyltransferase 112 homolog                                         | 1.66          |
| <b>Amino Acid Transporters</b>                                                  |                                                                            |               |
| SLC6A19                                                                         | Neutral amino acid transporter B(0)                                        | 4.18          |
| SLC7A5                                                                          | Solute carrier family 7 (Cationic AA transporter, y+ system), member 5     | 3.05          |

-Proteins listed above (30 in total) were all upregulated in MCF7-Fibroblast Co-cultures (p <0.05).

**Supplementary Table 5. Proteomics Analysis: Markers of Cell Proliferation and Stemness are Up-regulated in MCF7-Fibroblast Co-Cultures.**

| <b>Gene Symbol</b> | <b>Description</b>                 | <b>Fold-Increase</b> | <b>Specificity</b>                                                                                                                                         |
|--------------------|------------------------------------|----------------------|------------------------------------------------------------------------------------------------------------------------------------------------------------|
| MKI67              | Antigen KI-67                      | 4,531.38             | Expressed in all cycling cells, except for resting cells in the G0-phase; Associated also with ribosomal RNA (rRNA) synthesis and, thus, protein synthesis |
| KRT19              | Keratin, type I cytoskeletal 19    | 5.94                 | Marker of CSCs and breast cancer metastasis (sentinel lymph node)                                                                                          |
| PCNA               | Proliferating cell nuclear antigen | 3.87                 | Marker for the G1/S phase of the cell cycle                                                                                                                |

---

-Proteins listed above were upregulated in MCF7-Fibroblast Co-cultures ( $p < 0.05$ ).

-In human breast cancer cells *in vivo*, KRT19 was transcriptionally up-regulated by 4.39-fold ( $p=2.66E-05$ ), relative to the adjacent tumor stroma. Similarly, PCNA levels were up-regulated by 3.58-fold ( $p=3.64E-04$ ).

**Supplementary Table 6. Nuclear Mitochondrial Gene Transcripts Up-regulated in Human Breast Cancers (Cancer Epithelia vs. Tumor Stroma).**

| Gene Symbol | Fold-Increase | P-Value  |
|-------------|---------------|----------|
| UQCRFS1     | 5.71          | 2.45E-07 |
| MCCC2       | 5.48          | 5.78E-07 |
| ATP5A1      | 5.01          | 3.09E-06 |
| UQCRC2      | 4.84          | 5.73E-06 |
| IMMT        | 4.71          | 8.89E-06 |
| IARS2       | 4.70          | 9.15E-06 |
| GOT2        | 4.58          | 1.40E-05 |
| LRPPRC      | 4.34          | 3.15E-05 |
| ECHS1       | 4.05          | 8.22E-05 |
| ATP5H       | 4.01          | 9.48E-05 |
| VDAC2       | 3.99          | 0.0001   |
| DLD         | 3.78          | 0.0002   |
| PPT1        | 3.76          | 0.0002   |
| SLC25A3     | 3.76          | 0.0002   |
| HSPA9       | 3.69          | 0.0002   |
| SLC25A5     | 3.49          | 0.0005   |
| HSPD1       | 3.42          | 0.0006   |
| COX4I1      | 3.39          | 0.0007   |
| TUFM        | 3.38          | 0.0007   |
| HADHA       | 3.27          | 0.0009   |
| PPA2        | 3.19          | 0.001    |
| IDH1        | 3.18          | 0.001    |
| OAT         | 3.17          | 0.001    |
| SUCLG2      | 3.03          | 0.002    |
| DNAJA3      | 2.92          | 0.003    |
| NDUFA5      | 2.75          | 0.004    |
| CHCHD3      | 2.74          | 0.004    |
| SLC25A13    | 2.69          | 0.005    |
| VDAC1       | 2.64          | 0.005    |
| MRPS28      | 2.25          | 0.01     |
| PRKDC       | 2.14          | 0.02     |
| ABAT        | 2.08          | 0.02     |
| ECH1        | 1.97          | 0.03     |
| ETFA        | 1.75          | 0.04     |

-Transcriptional profiling data derived from the analysis of N=28 breast cancer patients are shown, high-lighting the levels of fold-upregulation observed in the epithelial cancer cell compartment (relative to the tumor stroma), and corresponding p-values derived from the analysis of these clinical samples.

-Proteins listed above (34 in total) were all upregulated in MCF7-Fibroblast Co-cultures (Compare with **Supplementary Table 1**) (p <0.05).

**Supplementary Table 7. Ribosomal Protein Gene Transcripts Up-regulated in Human Breast Cancers (Cancer Epithelia vs. Tumor Stroma).**

| <b>Gene Symbol</b> | <b>Fold-Increase</b> | <b>P-Value</b> |
|--------------------|----------------------|----------------|
| RPL24              | 5.38                 | 8.11E-07       |
| RPL3               | 5.01                 | 3.14E-06       |
| RPL10              | 4.91                 | 4.48E-06       |
| RPL15              | 4.60                 | 1.28E-05       |
| RPL13              | 4.48                 | 1.98E-05       |
| RPL14              | 4.45                 | 2.15E-05       |
| RPL6               | 4.00                 | 9.86E-05       |
| RPL19              | 3.98                 | 0.0001         |
| RPL8               | 3.86                 | 0.00015        |
| RPLP2              | 3.80                 | 0.0002         |
| RPL34              | 3.63                 | 0.0003         |
| RPL4               | 3.05                 | 0.002          |
| RPL29              | 2.94                 | 0.002          |
| RPL27A             | 2.87                 | 0.003          |
| RPL5               | 2.74                 | 0.004          |
| RPL28              | 2.33                 | 0.01           |
| RPL18A             | 2.28                 | 0.01           |
| RPL36AL            | 1.70                 | 0.048          |
| RPS18              | 4.96                 | 3.71E-06       |
| RPS27A             | 4.63                 | 1.19E-05       |
| RPS3A              | 4.59                 | 1.35E-05       |
| RPS6               | 4.47                 | 2.04E-05       |
| RPS10              | 4.18                 | 5.34E-05       |
| RPS19              | 4.17                 | 5.49E-05       |
| RPS11              | 3.58                 | 0.0004         |
| RPS2               | 3.36                 | 0.0007         |
| RPS29              | 2.31                 | 0.01           |

---

-Transcriptional profiling data derived from the analysis of N=28 breast cancer patients are shown, high-lighting the levels of fold-upregulation observed in the epithelial cancer cell compartment (relative to the tumor stroma), and corresponding p-values derived from the analysis of these clinical samples.

-Proteins listed above (27 in total) were all upregulated in MCF7-Fibroblast Co-cultures (Compare with **Supplementary Table 2**). (p <0.05).



**Supplementary Table 8. Other Chaperone Gene Transcripts Up-regulated in Human Breast Cancers (Cancer Epithelia vs. Tumor Stroma).**

| <b>Gene Symbol</b> | <b>Fold-Increase</b> | <b>P-Value</b> |
|--------------------|----------------------|----------------|
| HSP90AB1           | 4.93                 | 4.03E-06       |
| HSPA5              | 3.89                 | 0.0001         |
| HSP90AA1           | 3.76                 | 0.0002         |
| HSPA4              | 3.75                 | 0.0002         |
| HSPB1              | 3.27                 | 0.001          |
| HSPH1              | 3.18                 | 0.001          |
| HSPA8              | 3.11                 | 0.002          |

---

-Transcriptional profiling data derived from the analysis of N=28 breast cancer patients are shown, high-lighting the levels of fold-upregulation observed in the epithelial cancer cell compartment (relative to the tumor stroma), and corresponding p-values derived from the analysis of these clinical samples.

-Proteins listed above (7 in total) were all upregulated in MCF7-Fibroblast Co-cultures (Compare with **Supplementary Table 3**). (p <0.05).

**Supplementary Table 9. Transcripts of Genes Associated with mRNA Translation Initiation, Polypeptide Elongation, and tRNA Synthesis Are All Up-regulated in Human Breast Cancers (Cancer Epithelia vs. Tumor Stroma).**

| Gene Symbol                                                                     | Fold-Increase | P-Value  |
|---------------------------------------------------------------------------------|---------------|----------|
| <b>Translation initiation factors (required for mRNA binding to ribosomes)</b>  |               |          |
| EIF4H                                                                           | 4.77          | 7.20E-06 |
| EIF3H                                                                           | 4.70          | 9.25E-06 |
| EIF5                                                                            | 3.90          | 0.0001   |
| EIF3E                                                                           | 3.57          | 0.0004   |
| EIF3A                                                                           | 2.51          | 0.008    |
| EIF3B                                                                           | 2.21          | 0.02     |
| <b>Elongation factors (promote delivery of aminoacyl tRNAs to the ribosome)</b> |               |          |
| EEF2                                                                            | 4.01          | 9.29E-05 |
| EEF1G                                                                           | 3.71          | 0.0002   |
| TUFM                                                                            | 3.38          | 0.0007   |
| EEF1A1                                                                          | 3.16          | 0.001    |
| EEF1D                                                                           | 2.50          | 0.008    |
| <b>Enzymes for tRNA Synthesis</b>                                               |               |          |
| IARS2                                                                           | 4.70          | 9.15E-06 |
| RTCB                                                                            | 4.59          | 1.37E-05 |
| MARS                                                                            | 4.35          | 3.00E-05 |
| EPRS                                                                            | 4.06          | 8.10E-05 |
| QARS                                                                            | 3.73          | 0.0002   |
| DARS                                                                            | 3.43          | 0.0006   |
| DTD1                                                                            | 1.78          | 0.04     |
| YARS                                                                            | 1.72          | 0.046    |

-Transcriptional profiling data derived from the analysis of N=28 breast cancer patients are shown, high-lighting the levels of fold-upregulation observed in the epithelial cancer cell compartment (relative to the tumor stroma), and corresponding p-values derived from the analysis of these clinical samples.

-Proteins listed above (19 in total) were all upregulated in MCF7-Fibroblast Co-cultures (**Compare with Supplemental Table 4**). ( $p < 0.05$ ).

**Supplementary Table 10. Proteomics Analysis: Stromal CAF Markers are Up-regulated in MCF7-Fibroblast Co-Cultures**

| Gene Symbol                                                                | Description                                                   | Fold-Increase |
|----------------------------------------------------------------------------|---------------------------------------------------------------|---------------|
| <b>Glycolytic Enzymes</b>                                                  |                                                               |               |
| PKM                                                                        | Pyruvate kinase                                               | Infinity      |
| LDHA                                                                       | L-Lactate dehydrogenase A                                     | 426.16        |
| PGD                                                                        | 6-Phosphogluconate dehydrogenase, decarboxylating             | 13.59         |
| ENO1                                                                       | Alpha-Enolase                                                 | 11.60         |
| ALDOA                                                                      | Fructose-bisphosphate aldolase                                | 7.14          |
| PGI                                                                        | Glucose-6-phosphate isomerase                                 | 5.02          |
| PFK                                                                        | 6-Phosphofructokinase                                         | 4.14          |
| PGK1                                                                       | Phosphoglycerate kinase 1                                     | 4.38          |
| TPI1                                                                       | Triosephosphate isomerase 1                                   | 2.66          |
| G6PD                                                                       | Glucose-6-phosphate 1-dehydrogenase                           | 2.28          |
| <b>Cytoskeletal and Extracellular Matrix Proteins</b>                      |                                                               |               |
| MYH9                                                                       | Myosin Heavy Chain 9                                          | 226.32        |
| COL4A1                                                                     | Collagen Type IV Alpha 1 Chain                                | 211.46        |
| CTTN                                                                       | Cortactin                                                     | 202.50        |
| DNHD1                                                                      | Dynein heavy chain domain-containing protein 1                | 195.80        |
| NEFL                                                                       | Neurofilament light polypeptide                               | 124.55        |
| FLNA                                                                       | Filamin-A                                                     | 60.54         |
| KIF5C                                                                      | Kinesin heavy chain isoform 5C                                | 60.34         |
| TLN1                                                                       | Talin-1                                                       | 33.25         |
| S100P                                                                      | S100 Calcium Binding Protein P                                | 21.23         |
| SPTAN1                                                                     | Spectrin alpha chain, non-erythrocytic 1                      | 11.78         |
| MYH11                                                                      | Myosin Heavy Chain 11                                         | 8.99          |
| DYNC1H1                                                                    | Cytoplasmic dynein 1 heavy chain 1                            | 8.51          |
| COL1A1                                                                     | Collagen Type I Alpha 1 Chain                                 | 7.38          |
| CFL1                                                                       | Cofilin-1                                                     | 6.36          |
| MYO18B                                                                     | Myosin XVIIIIB                                                | 6.11          |
| PLEC1                                                                      | Plectin 1, intermediate filament binding protein              | 5.48          |
| SRRM2                                                                      | Serine/arginine repetitive matrix protein 2                   | 5.18          |
| S100A16                                                                    | S100 Calcium Binding Protein A16                              | 4.87          |
| SRRM1                                                                      | Serine/arginine repetitive matrix protein 1                   | 4.77          |
| ACTN2                                                                      | Alpha-actinin-2                                               | 4.31          |
| MAP4                                                                       | Microtubule-associated protein                                | 4.22          |
| DNM2                                                                       | Dynamamin-2                                                   | 4.10          |
| ARPC1B                                                                     | Actin related protein 2/3 complex, subunit 1B                 | 3.43          |
| MACF1                                                                      | Microtubule-actin cross-linking factor 1                      | 3.26          |
| VCL                                                                        | Vinculin                                                      | 2.66          |
| TPM4                                                                       | Tropomyosin alpha-4                                           | 2.65          |
| ANKRD12                                                                    | Ankyrin repeat domain-containing protein 12                   | 2.58          |
| VIL2                                                                       | Villin 2 (Ezrin)                                              | 2.57          |
| DYNC1LI2                                                                   | Cytoplasmic dynein 1 light intermediate chain 2               | 2.42          |
| VIM                                                                        | Vimentin                                                      | 2.37          |
| NEFM                                                                       | Neurofilament medium polypeptide                              | 2.35          |
| TUBB3                                                                      | Tubulin beta-3                                                | 2.35          |
| <b>Senescence and the SASP (Senescence-Associated Secretory Phenotype)</b> |                                                               |               |
| HMGB2                                                                      | High mobility group protein B2                                | 64.01         |
| HMGB21                                                                     | High mobility group protein B1                                | 4.00          |
| <b>Autophagy/Lysosomal Markers</b>                                         |                                                               |               |
| ATP6V1E1                                                                   | ATPase, H <sup>+</sup> transporting, lysosomal, V1 subunit E1 | 2.60          |
| ATP6V1A                                                                    | V-type proton ATPase catalytic subunit A                      | 2.56          |
| CTSD                                                                       | Cathepsin D                                                   | 2.08          |

CTSZ

Cathepsin Z

2.07

---

-Proteins listed above were all upregulated in MCF7-Fibroblast Co-cultures ( $p < 0.05$ ).
